# Supplementary material for: Comparative analysis of Wnt expression identifies a highly conserved developmental transition in flatworms
Source: PubMed Central journal article supplement (PMC4778295; doi:10.1186/s12915-016-0233-x), 2016-03-04
Supplement: 12915_2016_233_MOESM3_ESM.pdf [file 12915_2016_233_MOESM3_ESM.pdf]

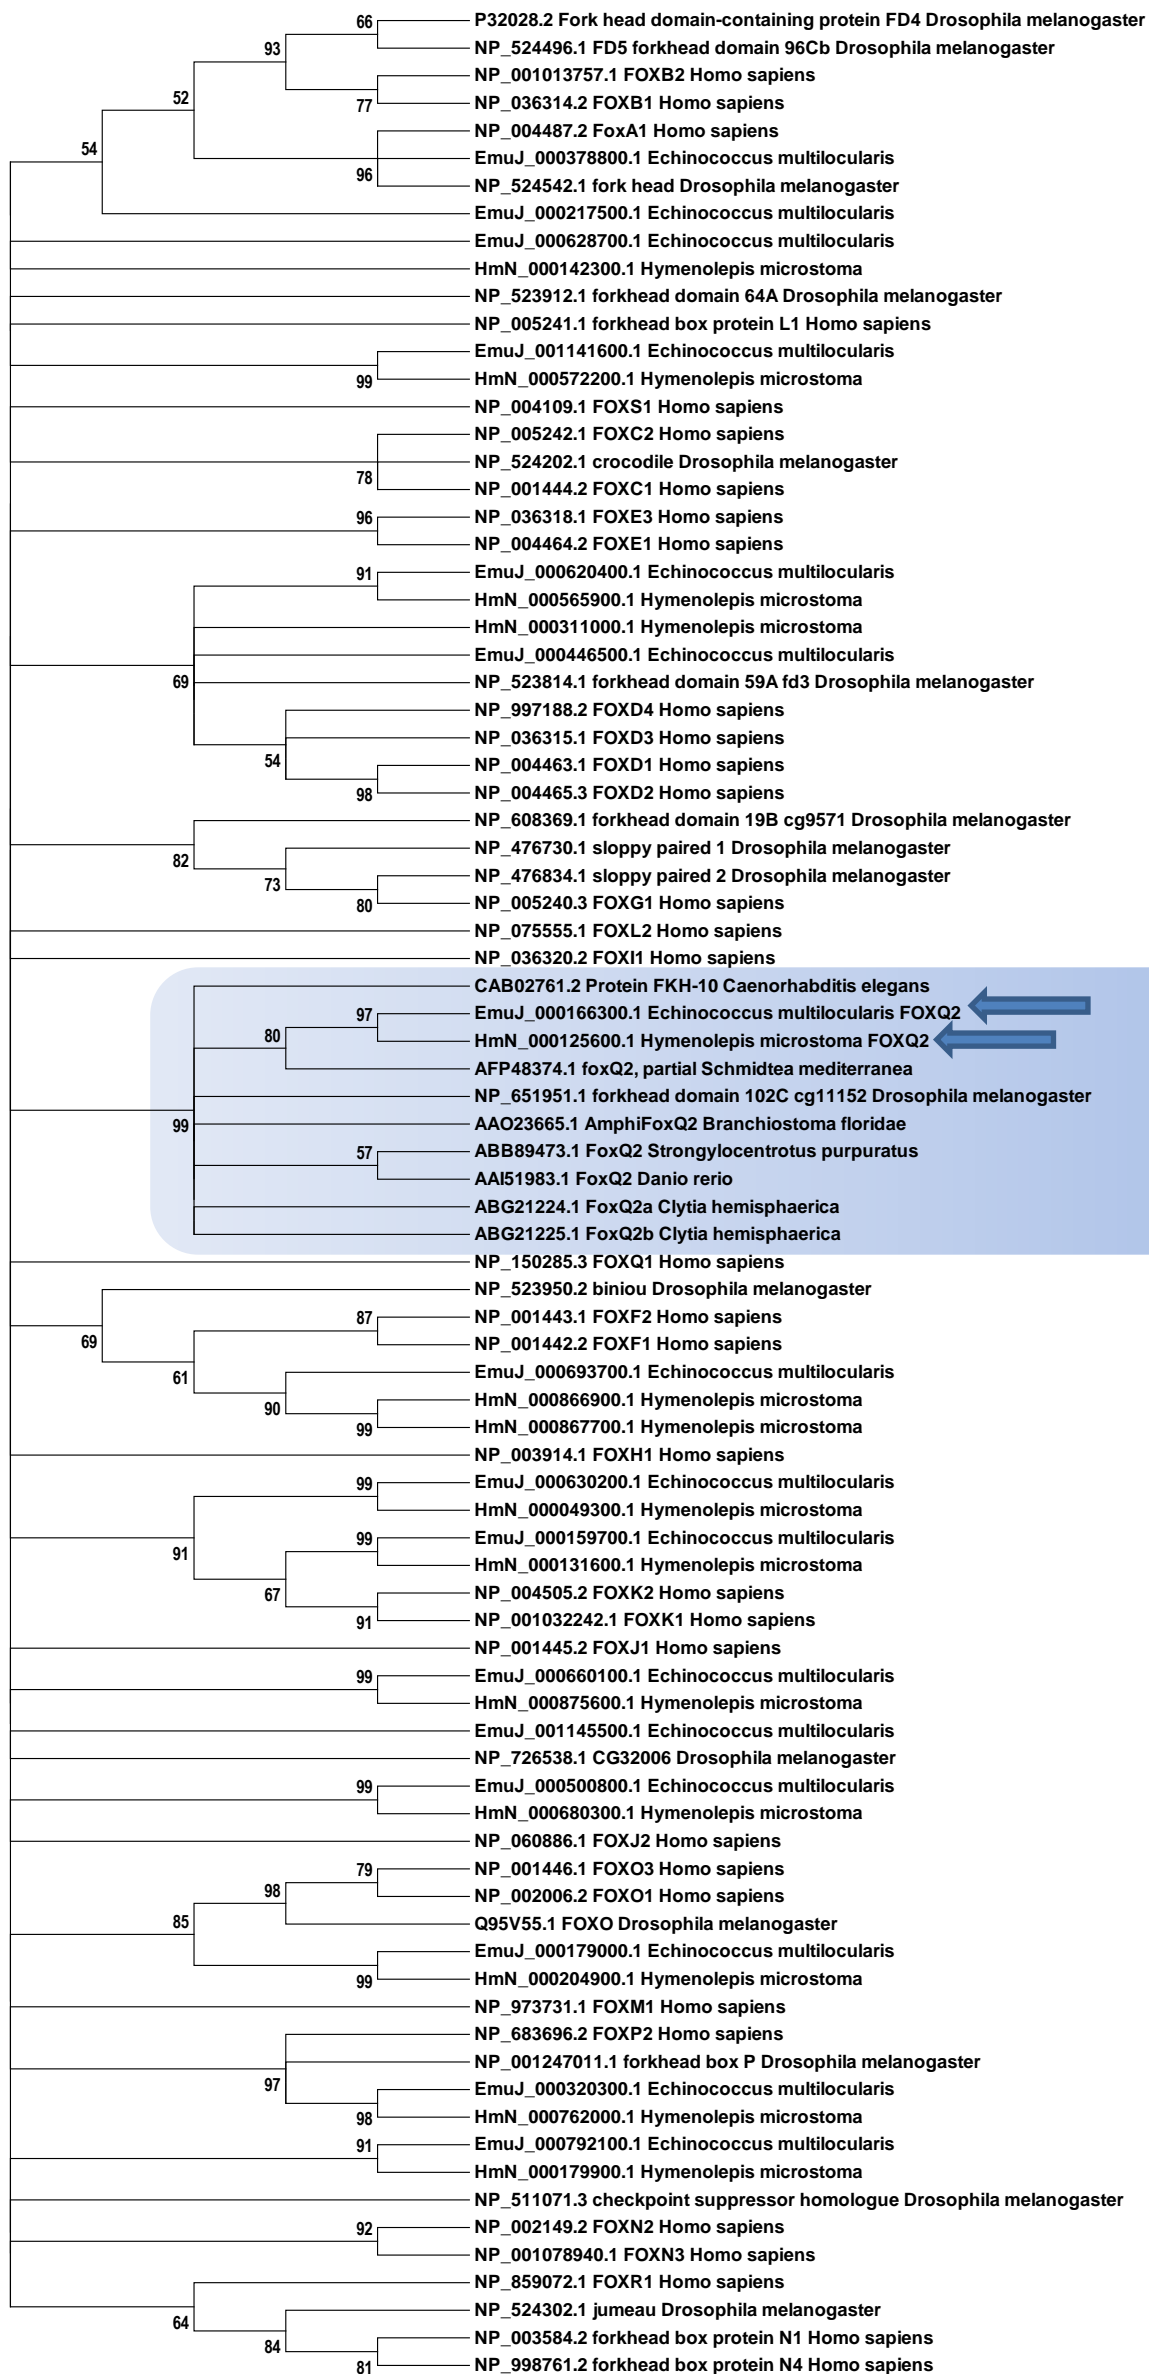

**FoxQ2  
group**
