# Supplementary material for: Comparative analysis of Wnt expression identifies a highly conserved developmental transition in flatworms
Source: BMC Biol. 2016 Mar 4;14:10. doi: 10.1186/s12915-016-0233-x (PMC4778295; doi:10.1186/s12915-016-0233-x)
Supplement: Additional file 6: — List of genes studied in this work. The GeneDB codes (www.genedb.org) of E. multilocularis and H. microstoma gene models are given, together with the primer sequences used for transcript amplification by RT-PCR. (XLSX 12 kb) [file 12915_2016_233_MOESM6_ESM.xlsx]

## Sheet: Hoja1
Species	gene name	GeneDB Model No.	Forward primer	Reverse primer	Identification
E. multilocularis	Em-sfrp	EmuJ_000838700	ATGCTTCCCCTCGTGATCCTC	TCATTGGGTTTGTGGCAGGTAG	Tsai et al. 2013. Nature 496:57-63
E. multilocularis	Em-sfl	EmuJ_001023000	TGCATAAACTAGCACTGTTGTTATCACTTC	ATTCTATGACAAGTCTGTCCAGATAACATG	Tsai et al. 2013. Nature 496:57-64
E. multilocularis	Em-wnt1	EmuJ_000349900	ATGTCAGCAGGAGTTAGAGTCATTCTACC	TGGCATTCCACTCTACAACACCAC	Riddiford and Olson. 2011. Development Genes and Evolution 221:187–197
E. multilocularis	Em-wnt11a	EmuJ_000907500	CACGACAGGCGAGGTTCTGTAAC	TTTACCAACAAAGTTGATGGAAGACTG	Riddiford and Olson. 2011. Development Genes and Evolution 221:187–197
E. multilocularis	Em-wnt11b	EmuJ_000104000	CCTCGCTGCAGTTGGACTGATC	TACAAATGTTTCGTCGAACAATTCTGG	Riddiford and Olson. 2011. Development Genes and Evolution 221:187–197
E. multilocularis	Em-wnt2	EmuJ_000748600	ATGCCAAATGACCTTCAGACCTC	GACTTTCGACGTTGTCCTCTCC	Riddiford and Olson. 2011. Development Genes and Evolution 221:187–197
E. multilocularis	Em-wnt4	EmuJ_000211300	ATGCTCTATCTGTTCTGGGTCAGTAGTG	TCAGTTGCAGGTGGAAACGACC	Riddiford and Olson. 2011. Development Genes and Evolution 221:187–197
E. multilocularis	Em-wnt5	EmuJ_000804000	ATGAATCCAGCGGTCATACTCA	CAAATGTGCACCTCCTCCCTTC	Riddiford and Olson. 2011. Development Genes and Evolution 221:187–197
E. multilocularis	Em-fz4	EmuJ_000636500	ATGACAGGAAAAGATATTACTTGGCTCATC	TCACACACATTCATTACTGTTCGGTGGTC	Additional File 1 (also Tsai et al. 2013. Nature 496:57-63; N.B. = Frizzled-B)
E. multilocularis	Em-six3/6	EmuJ_000106600	ATGCCCACCCAGAAGGAGGTATTG	TCACAAGAAAGCCGCAGCTTC	Additional File 2 (also Tsai et al. 2013. Nature 496:57-63)
E. multilocularis	Em-foxQ2	EmuJ_000166300	ATGAGGGAGCTGAAGTCGCTTAATAATG	TCACCTTCCCAATAGACTGGCTACAC	Additional File 3
E. multilocularis	Em-post2b	EmuJ_000959700	CTCAGTCTACGCCACAGCCGATAC	TCCGTTATTTGGCATAATCACAGATG	Koziol et al. 2009. Biochemical Genetics 47:100-116
H. microstoma	Hm-sfrp	HmN_000556500	TGGCCGATTGACTACTGCAGATG	TGATAGTGTTGGTAATAGGGATGCTGG	Tsai et al. 2013. Nature 496:57-63
H. microstoma	Hm-sfl	HmN_000359400	ACCTACTGTTCCCATGCAGC	TCCAAGCATCCCGTTGTTGA	(this study)
H. microstoma	Hm-wnt1	HmN_000328000	TGAGTGACAACGGAATCAAT	TCATAACTAGAGCGGCTTTC	Riddiford and Olson. 2011. Development Genes and Evolution 221:187–197
H. microstoma	Hm-wnt11a	Not predicted	TTGTCGTGAAACAGGAGGCA	TGTGCCGTACTTCATTTCGGA	Riddiford and Olson. 2011. Development Genes and Evolution 221:187–197
H. microstoma	Hm-wnt11b	HmN_000022800	TGCTCTGCCTACTTCAGGTGGA	CGTGACCTCTTCCGCAGCACA	Riddiford and Olson. 2011. Development Genes and Evolution 221:187–197
H. microstoma	Hm-wnt2	HmN_000112200	ATTTTACTCAAACACCCAACCGTC	GCATTTCACTTCACAACACCAAAC	Riddiford and Olson. 2011. Development Genes and Evolution 221:187–197
H. microstoma	Hm-wnt4	HmN_000808600	ACTGGCCGCCCGCGACCTGAACTG	TGGACCTTTTGAGTCAACACTACA	Riddiford and Olson. 2011. Development Genes and Evolution 221:187–197
H. microstoma	Hm-wnt5	HmN_000108100	TCCCTGCTAAAATGTTACCCATCA	CACAAAAGTTGGGTGAATCCTCAA	Riddiford and Olson. 2011. Development Genes and Evolution 221:187–197
H. microstoma	Hm-fz4	HmN_000319700	GCGGGCAAGAAATTCGCTAG	CTCGTGATGGCGACGACATA	Additional File 1 (also Tsai et al. 2013. Nature 496:57-63; N.B. = Frizzled-B)
